# Supplementary material for: Design Hybrid Porous Organic/Inorganic Polymers Containing Polyhedral Oligomeric Silsesquioxane/Pyrene/Anthracene Moieties as a High-Performance Electrode for Supercapacitor
Source: MDPI journal article supplement (doi:10.3390/ijms24032501), 2023-01-28
Supplement: s1 [file s1]

**Supporting Information for**

**Design Hybrid Porous Organic/Inorganic Polymers Containing Polyhedral Oligomeric Silsesquioxane/Pyrene/Anthracene Moieties as a High-Performance Electrode for Supercapacitors**

**Mohsin Ejaz<sup>1</sup>, Maha Mohammed Samy<sup>1,2</sup>, Yunsheng Ye<sup>1</sup>, Shiao-Wei Kuo<sup>1,3\*</sup> and Mohamed Gamal Mohamed<sup>1,2,\*</sup>**

## Characterization

FTIR spectra were collected using a Bruker Tensor 27 FTIR spectrophotometer at a resolution of 4  $\text{cm}^{-1}$  and the KBr disk method.  $^{13}\text{C}$  nuclear magnetic resonance (NMR) spectra were recorded using an INOVA 500 instrument, with  $\text{CDCl}_3$  as the solvent and tetramethylsilane (TMS) as the external standard; chemical shifts are reported in parts per million (ppm). The thermal stabilities of the samples under  $\text{N}_2$  were measured using a TG Q-50 thermogravimetric analyzer; the cured sample (ca. 5 mg) was placed in a Pt cell and then heated at  $20\text{ }^\circ\text{C min}^{-1}$  from 100 to  $800\text{ }^\circ\text{C}$  under a  $\text{N}_2$  flow of  $60\text{ mL min}^{-1}$ . Wide-angle X-ray diffraction (WAXD) patterns were measured at the wiggler beamline BL17A1 of the National Synchrotron Radiation Research Center (NSRRC), Taiwan; a triangular bent Si (111) single crystal was used to obtain a monochromated beam having a wavelength ( $\lambda$ ) of  $1.33\text{ \AA}$ . The morphologies of the polymer samples were examined through field emission scanning electron microscopy (FE-SEM; JEOL JSM7610F) and transmission electron microscopy (TEM), using a JEOL-2100 microscope operated at an accelerating voltage of 200 kV. BET surface areas and porosimetry measurements of the samples (ca. 40–100 mg) were performed using a BEL Master<sup>TM</sup> instrument and BEL sim<sup>TM</sup> software (v. 3.0.0);  $\text{N}_2$  adsorption and desorption isotherms were generated through incremental exposure to ultrahigh-purity  $\text{N}_2$  (up to ca. 1 atm) in a liquid  $\text{N}_2$  (77 K) bath; surface parameters were calculated using the BET adsorption models in the instrument's software. The pore sizes of the prepared samples were determined using nonlocal density functional theory (NLDFT).

## Electrochemical Analysis

**Working Electrode Cleaning:** Prior to use, the glassy carbon electrode (GCE) was polished several times with  $0.05\text{-}\mu\text{m}$  alumina powder, washed with EtOH after each polishing step, cleaned through sonication (5 min) in a water bath, washed with EtOH, and then dried in air.

**Electrochemical Characterization:** The electrochemical experiments were performed in a three-electrode cell using an Autolab potentiostat (PGSTAT204) and 1 M KOH as the aqueous electrolyte.

The GCE was used as the working electrode (diameter: 5.61 mm; 0.2475 cm<sup>2</sup>); a Pt wire was used as the counter electrode; Hg/HgO (RE-1B, BAS) was the reference electrode. All reported potentials refer to the Hg/HgO potential. A slurry was prepared by dispersing the OVS-A HPP or OVS-P-A HPP sample (45 wt. %), carbon black (45 wt. %), and Nafion (10 wt. %) in a mixture of (EtOH/ H<sub>2</sub>O) (200 µL: 800 µL) and then sonicated for 1 h. A portion of this slurry (10 µL) was pipetted onto the tip of the electrode, which was then dried in the oven for 30 min at 40 °C. The electrochemical performance was studied through CV at various sweep rates (5–200 mV s<sup>-1</sup>) and through the GCD method in the potential range from 0 to –1.00 V (vs. Hg/HgO) at various specific currents (0.5–20 A g<sup>-1</sup>) in 1 M KOH as the aqueous electrolyte solution.

The specific capacitance was calculated from the GCD data using the equation:

$$C_s = (I\Delta t)/(m\Delta V) \quad (\text{S1})$$

Where  $C_s$  (F g<sup>-1</sup>) is the specific capacitance of the supercapacitor,  $I$  (A) is the discharge current,  $\Delta V$  (V) is the potential window,  $\Delta t$  (s) is the discharge time, and  $m$  (g) is the mass of the NPC on the electrode. The energy density ( $E$ , W h kg<sup>-1</sup>) and power density ( $P$ , W kg<sup>-1</sup>) were calculated using the equations.

$$E = 1000C(\Delta V)^2/(2 \times 3600)$$

$$P = E/(t/3600)$$

For capacitance calculation for the non-linear GCD curve for the OVS-P-A HPP sample (**Figure 6(d)**):

$$C = \frac{2I \int V dt}{mV^2} \quad (\text{S2})$$

Where:  $\int V dt$  is the area under the discharge curve obtained from GCD;  $\frac{I}{m}$  is the specific current (0.5–20 A/g); and  $V$  is the potential window.

We evaluated the electrochemical functionality of a symmetric supercapacitor using a CR2032 coin cell, which consists of an anode and cathode, a bottom and top cover, a metal spring, a separator, and an electrolyte. Our compounds served as both the cathode and the anode in order to construct a symmetric supercapacitor. The slurry was created by combining 2 mg of OVS-A HPP or OVS-A-P HPP, 2 mg of conductive carbon, 20 mL of Nafion, 200 mL of ethanol, and 400 mL of water. It was then sonicated for an hour and cast onto carbon paper. We used a Selemion AMV membrane with an electrolyte of 1.0 M aqueous KOH.

The specific capacitance was calculated in assembled supercapacitor from the GCD data using the following equations:

$$C_s = 2(I\Delta t)/(m\Delta V) \quad (\text{S3})$$

where  $C_s$  ( $\text{F g}^{-1}$ ) is the specific capacitance of the supercapacitor,  $I$  (A) is the discharge current,  $\Delta V$  (V) is the potential window,  $\Delta t$  (s) is the discharge time, and  $m$  (g) is the mass of the CMP in the single electrode.

The energy density ( $E$ ,  $\text{W h kg}^{-1}$ ) and power density ( $P$ ,  $\text{W kg}^{-1}$ ) were calculated using the equations:

$$E_{\text{cell}} = 1000 C_s (\Delta V)^2 / (4.2.3600) \quad (\text{S4})$$

and

$$P_{\text{cell}} = E_{\text{cell}} / (t/3600) \quad (\text{S5})$$

**Table S1.** Comparison between the specific surface area/specific capacitance OVS-A HPP and OVS-P-A HPP with those of previously reported materials for supercapacitor application.

| Electrode              | $S_{\text{BET}}$<br>( $\text{m}^2 \text{g}^{-1}$ ) | Capacitance                                       | Ref.      |
|------------------------|----------------------------------------------------|---------------------------------------------------|-----------|
| <b>OVS-A HPP</b>       | 433                                                | 120 $\text{F g}^{-1}$ at 0.5 $\text{A g}^{-1}$    | This work |
| <b>OVS-P-A HPP</b>     | 98                                                 | 177 $\text{F g}^{-1}$ at 0.5 $\text{A g}^{-1}$    | This work |
| <b>POSS-OXD POIP</b>   | 94                                                 | 119 $\text{F g}^{-1}$ at 0.5 $\text{A g}^{-1}$    | S1        |
| <b>POSS-Th POIP</b>    | 605                                                | 213 $\text{F g}^{-1}$ at 0.5 $\text{A g}^{-1}$    | S1        |
| <b>POSS-TPTTh POIP</b> | 682                                                | 354 $\text{F g}^{-1}$ at 0.5 $\text{A g}^{-1}$    | S1        |
| <b>Cz-Cz CMP</b>       | 623                                                | 43.70 $\text{F g}^{-1}$ at 0.5 $\text{A g}^{-1}$  | S2        |
| <b>Cz-TPA CMP</b>      | 618                                                | 271.82 $\text{F g}^{-1}$ at 0.5 $\text{A g}^{-1}$ | S2        |
| <b>Cz-TP CMP</b>       | 412                                                | 67.38 $\text{F g}^{-1}$ at 1 $\text{A g}^{-1}$    | S2        |
| <b>POSS-A-POIP</b>     | 426                                                | 152.5 $\text{F g}^{-1}$ at 0.5 $\text{A g}^{-1}$  | S3        |
| <b>POSS-F-POIP</b>     | 452                                                | 36.2 $\text{F g}^{-1}$ at 0.5 $\text{A g}^{-1}$   | S3        |
| <b>H-THAQ</b>          | -                                                  | 15 $\text{F g}^{-1}$ at 1 $\text{A g}^{-1}$       | S4        |
| <b>THAQ/rGO (2:1)</b>  | -                                                  | 76 $\text{F g}^{-1}$ at 1 $\text{A g}^{-1}$       | S4        |
| <b>Pure AQ</b>         | -                                                  | 42 $\text{F g}^{-1}$ at 1 $\text{A g}^{-1}$       | S5        |
| <b>Fc-CMPs</b>         | 653.2                                              | 147 $\text{F g}^{-1}$ at 0.5 $\text{A g}^{-1}$    | S6        |
| <b>An-CPOP-1</b>       | 580                                                | 72.75 $\text{F g}^{-1}$ at 0.5 $\text{A g}^{-1}$  | S7        |
| <b>An-CPOP-2</b>       | 1130                                               | 98.4 $\text{F g}^{-1}$ at 0.5 $\text{A g}^{-1}$   | S7        |
| <b>DPT-HPP</b>         | 1230                                               | 110 $\text{F g}^{-1}$ at 0.5 $\text{A g}^{-1}$    | S8        |
| <b>TAT-CMP-1</b>       | 88                                                 | 141 $\text{F g}^{-1}$ at 1 $\text{A g}^{-1}$      | S9        |
| <b>TPE-DDSQ-POIP</b>   | 157.67                                             | 22 $\text{F g}^{-1}$ at 1 $\text{A g}^{-1}$       | S10       |
| <b>Car-DDSQ-POIP</b>   | 256.34                                             | 23 $\text{F g}^{-1}$ at 1 $\text{A g}^{-1}$       | S10       |

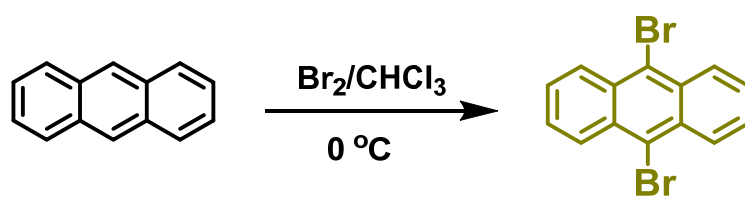

**Scheme S1.** Synthetic route for the preparation of A-Br<sub>2</sub>

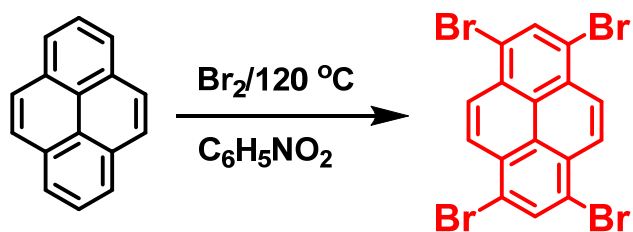

**Scheme S2.** Synthetic routes for the preparation of P-Br<sub>4</sub>.

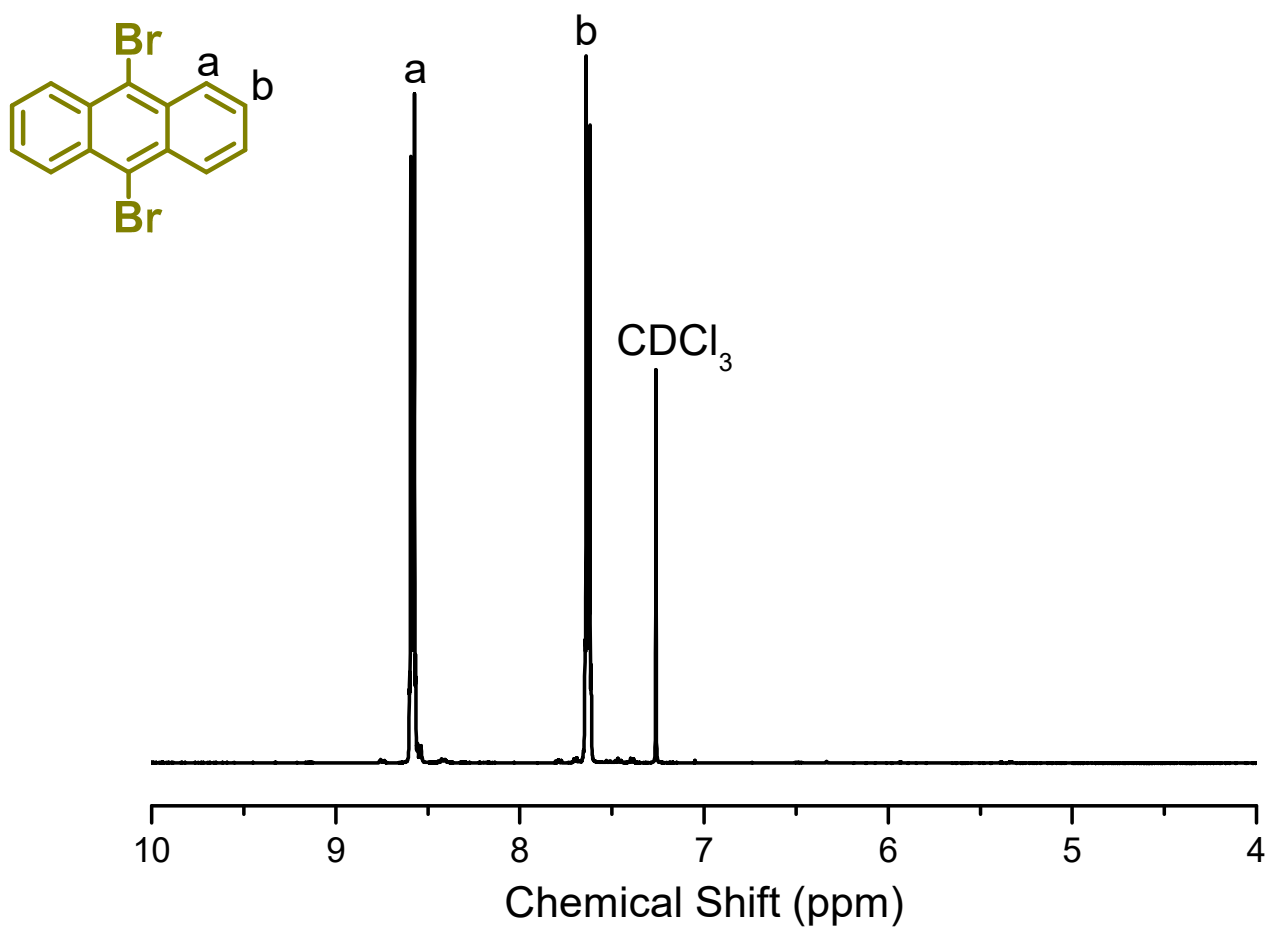

**Figure S1.**  $^1\text{H}$ -NMR spectrum of A-Br<sub>2</sub>.



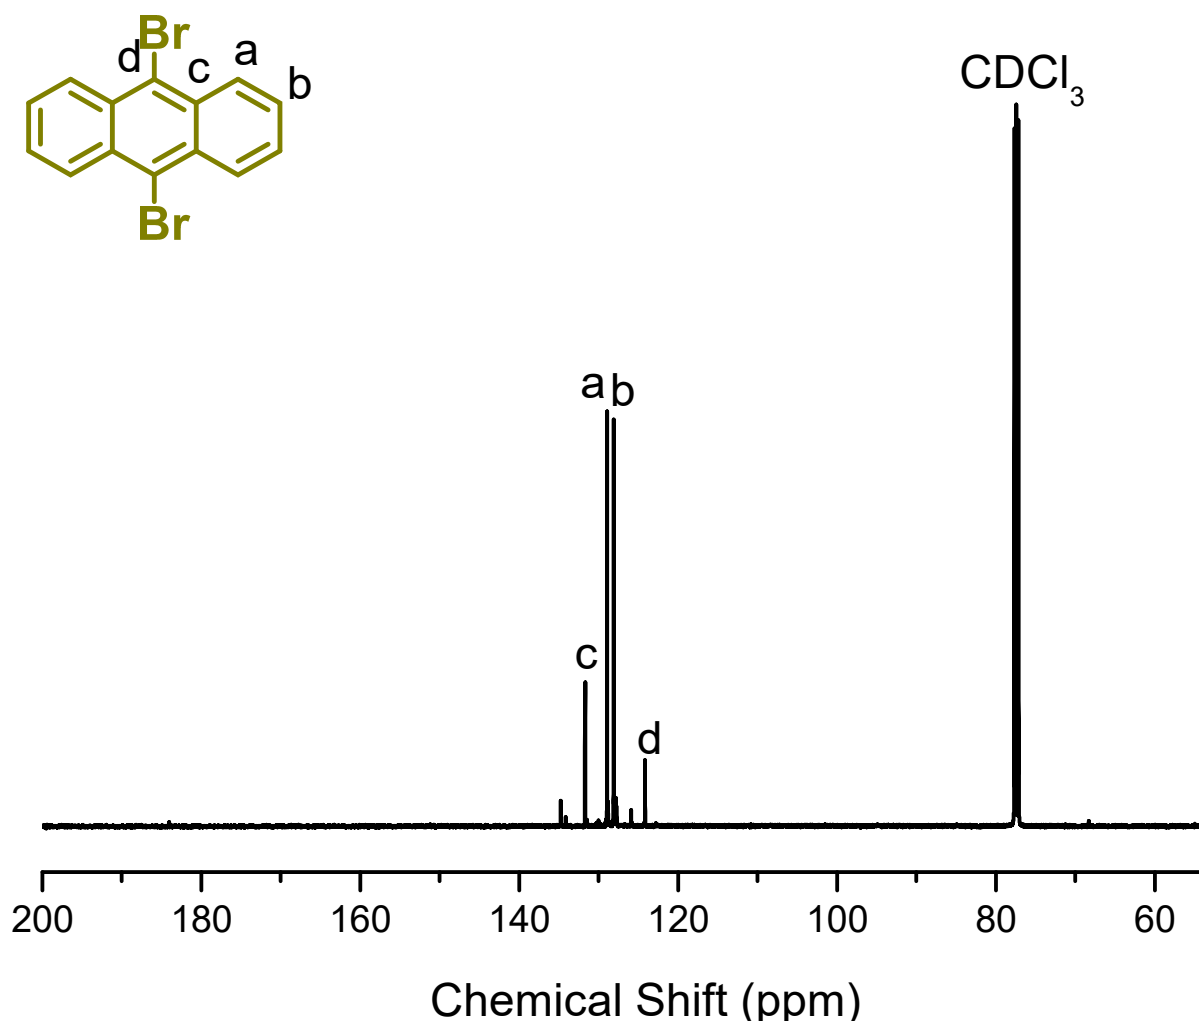

**Figure S2.**  $^{13}\text{C}$ -NMR spectrum of A-Br<sub>2</sub>.

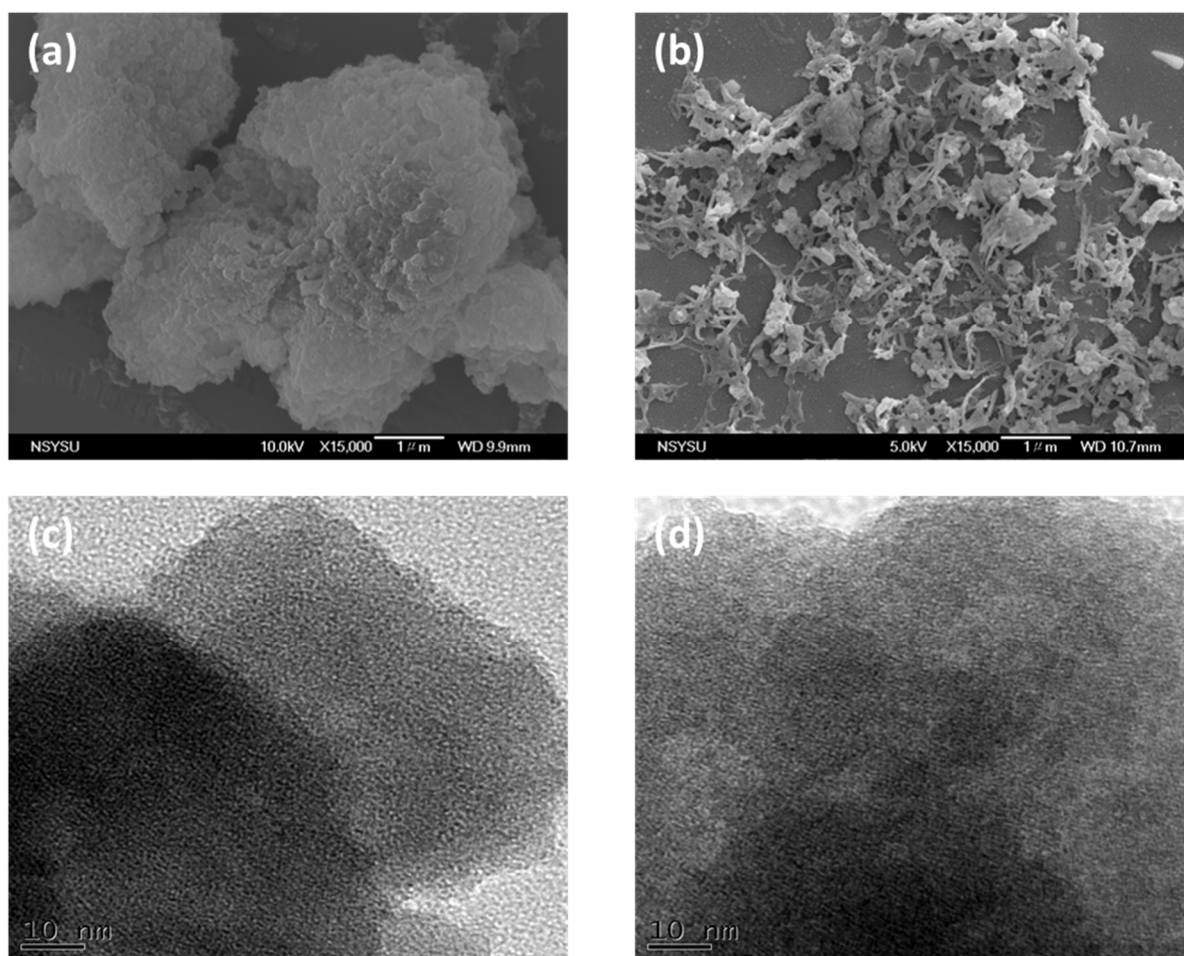

**Figure S3.** (a–b) SEM and (c–d) TEM images of the (a, c) OVSA HPP, (b, d) OVSP-A HPP.

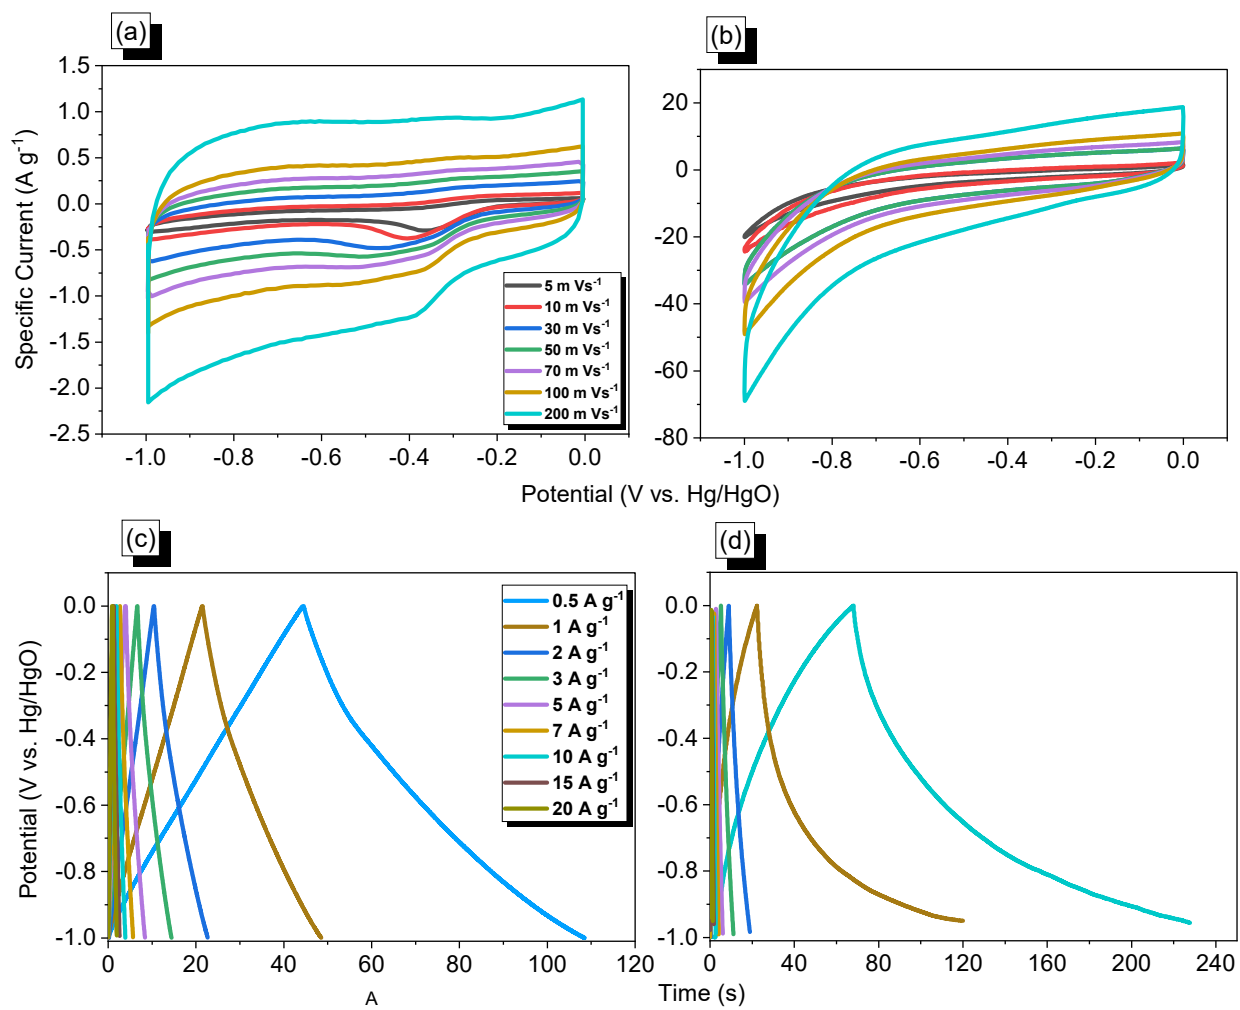

**Figure S4.** (a, b) CV and (c, d) GCD curves of SSC coin cells incorporating the (a, c) OVS-A HPP and (b, d) OVS-P-A HPP.

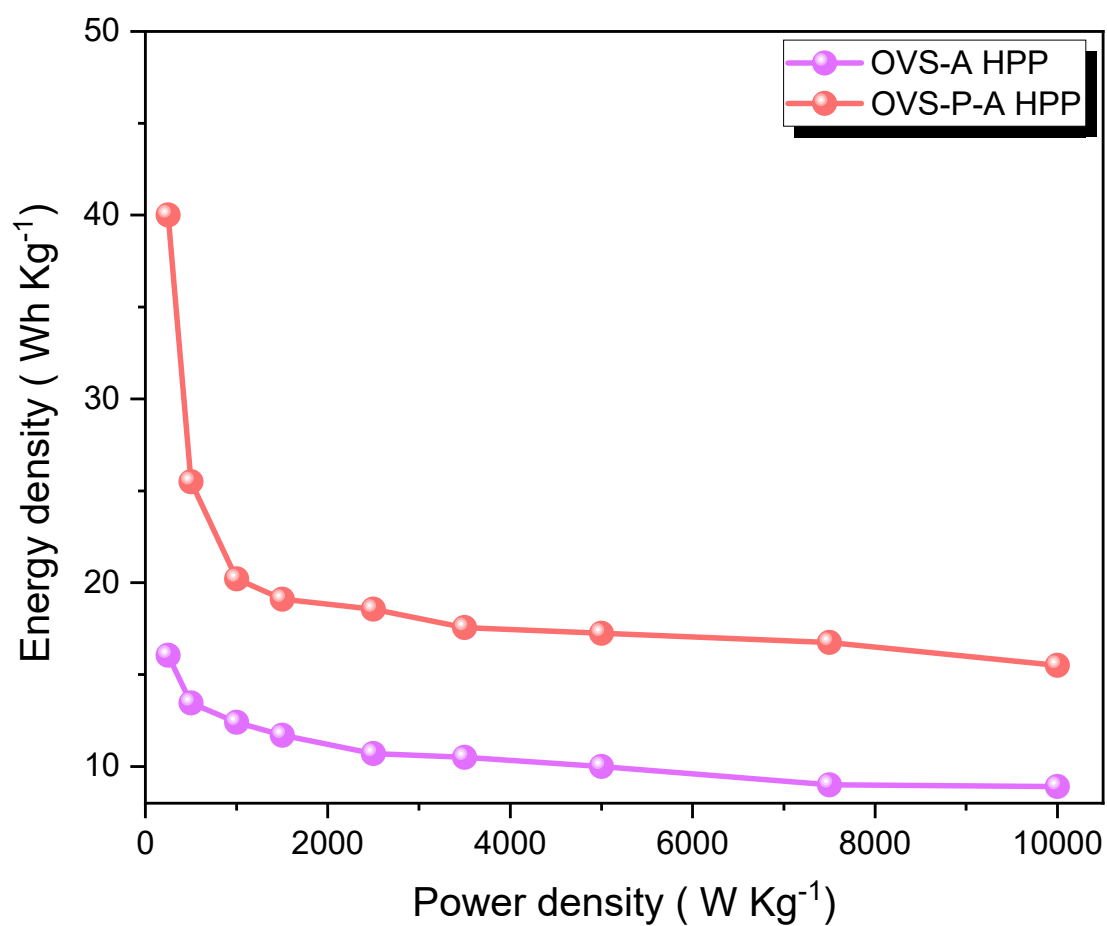

**Figure S5.** Ragone profiles of OVS-A HPP and OVS-P-A HPP were derived from the two-electrode system.

## References

- [S1] Ejaz, M.; Mohamed, M. G.; Sharma, S. U.; Lee, J. T.; Huang, C. F.; Chen, T.; & Kuo, S. W. An Ultrastable Porous Polyhedral Oligomeric Silsesquioxane/Tetraphenylthiophene Hybrid as a High-Performance Electrode for Supercapacitors. *Molecules*, (2022) 27(19), 6238. doi.org/10.3390/molecules27196238
- [S2] Saber, A. F.; Sharma, S. U.; Lee, J. T.; EL-Mahdy, A. F.; & Kuo, S. W. Carbazole-conjugated microporous polymers from Suzuki–Miyaura coupling for supercapacitors. *Polymer*, (2022) 254, 125070. doi.org/10.1016/j.polymer.2022.125070.
- [S3] Mohamed, M.G.; Mansoure, T.H.; Takashi, Y.; Samy, M.M.; Chen, T.; Kuo, S.-W. Ultrastable porous organic/inorganic polymers based on polyhedral oligomeric silsesquioxane (POSS) hybrids exhibiting high performance for thermal property and energy storage. *Microporous Mesoporous Mater.* 2021, 328, 111505. doi.org/10.1016/j.micromeso.2021.111505.
- [S4] Xu, L.; Shi, R.; Li, H.; Han, C.; Wu, M.; Wong, C.P. Kang, F.; Li, B. Pseudocapacitive anthraquinone modified with reduced graphene oxide for flexible symmetric all-solid-state supercapacitors, *Carbon*, 127 (2018) 459-468. doi.org/10.1016/j.carbon.2017.11.003.
- [S5] Guo, B.; Yang, Y.; Hu, Z.; An, Y.; Zhang, Q.; Yang, X.; Wang, X.; Wu, H. Redox-active organic molecules functionalized nitrogen-doped porous carbon derived from metal-organic framework as electrode materials for supercapacitor, *Electrochim. Acta*, 223 (2017) 74–84. doi.org/10.1016/j.electacta.2016.12.012.
- [S6] Khattak, A. M.; Sin, H.; Ghazi, Z.A.; He, X.; Liang, B.; Khan, N.A.; Alanagh, H.R.; Iqbal, A.; Li, L.; Tang, Z. Controllable fabrication of redox-active conjugated microporous polymers on reduced graphene oxide for high performance faradaic energy storage, *J. Mater. Chem. A*, 6 (2018)18827-18832. doi.org/10.1039/C8TA07913G.
- [S7] Mohamed, M.G.; Zhang, X.; Mansoure, T.H.; Mahdy, A.F.M. EL.; Huang, C.F.; Danko, M.; Xin, Z.; Kuo, S.W. Hypercrosslinked porous organic polymers based on tetraphenylanthraquinone for

CO<sub>2</sub> uptake and high-performance supercapacitor, *Polymer*, 205 (2020) 122857-122866.  
doi.org/10.1016/j.polymer.2020.122857

[S8] Mohamed, M.G.; Mahdy, A.F.M. EL.; Meng, T.S.; Samy, M.M.; Kuo, S.W. Multifunctional Hypercrosslinked Porous Organic Polymers Based on Tetraphenylethene and Triphenylamine Derivatives for High-Performance Dye Adsorption and Supercapacitor, *Polymers* 12 (2020) 2426.  
doi.org/10.3390/polym12102426.

[S9] Li, X.C.; Zhang, Y.; Wang, C. Y.; Y. Wan, Lai, W.Y.; Pang, H.; Huang, W. Redox-active triazatruxene-based conjugated microporous polymers for high-performance supercapacitors. *Chem. Sci.*, 8 (2017) 2959-2965. doi.org/10.1039/C6SC05532J.

[S10] Mohamed, M.G.; Chen, W.C; Mahdy, A.F.M.; Kuo, S.W. Porous organic/inorganic polymers based on double-decker silsesquioxane for high-performance energy storage, *J. Polym. Res.* 28 (2021) 219. doi.org/10.1007/s10965-021-02579-x
